# Supplementary material
Source: publisher figshare collection journal article supplement (https://tandf.figshare.com/ndownloader/files/21770919)
Supplement: Supplementary file 1 [file 21770919]

- What do language choices enable discourse to do or achieve?
- Drawing from Serenari and Taub’s (2019), how do these choices contribute to the delegitimization of red wolf recovery or other outcomes?
- What does this discursive event aim to do in social interaction? (e.g., attempt to persuade)
- Do discursive actors invite dialogue or maintain privileged access?
- Does the discourse present a narrative or argument about activities or performance? (e.g., U.S. Fish and Wildlife Service cannot ensure recovery)
- To what extent does content of the corpora influence how a particular discursive event contributes to delegitimization of red wolf recovery? (e.g., a budget hearing where defunding recovery is discussed)
